# Supplementary material for: Longitudinal Study of Advanced Non-Small Cell Lung Cancer with Initial Durable Clinical Benefit to Immunotherapy: Strategies for Anti-PD-1/PD-L1 Continuation beyond Progression
Source: MDPI journal article supplement (doi:10.3390/cancers15235587), 2023-11-26
Supplement: s1 [file s1]

| Record ID | TGR at baseline    | TGR at PD           | (TGR at PD) – (TGR at baseline)           |
|-----------|--------------------|---------------------|-------------------------------------------|
| 20        | 0                  | 0                   | 0                                         |
| 34        | 0                  | 0                   | 0                                         |
| 118       | 12.388174267142    | 1.7414546411449683  | -10.646719625997                          |
| 131       | 12.224674712953787 | 0                   | -12.224674712953787                       |
| 100       | 159.09177649222505 | 0                   | -159.09177649222505                       |
| 14        | 20.64531550717712  | 0                   | -20.64531550717712                        |
| 123       | 24.339482530031532 | 2.3903980877528763  | -21.949084442278654                       |
| 82        | 45.495517688939536 | 22.62471283020291   | -22.870804858736626                       |
| 99        | 263.9109874292884  | -13.598883758907165 | -277.5098711881956                        |
| 143       | 50.141727065929366 | 17.897769952690457  | -32.243957113238906                       |
| 139       | 77.40422359922444  | 44.235411086081825  | -33.16881251314261                        |
| 96        | 38.83106847625     | 0                   | -38.83106847625                           |
| 85        | 53.82943084646092  | 0                   | -53.82943084646092                        |
| 125       | 543.5177915994036  | 0                   | -543.5177915994036                        |
| 113       | 3.9356266368534    | 4.3653138036101     | 0.42968716675673                          |
| 51        | 10.67980381222795  | 20.852463043851486  | 10.172659231623536                        |
| 32        | -9.149241654065154 | 4.358268100050711   | 13.507509754115866                        |
| 65        | 0                  | 20.13360462037759   | 20.13360462037759                         |
| 138       | 11.730493284870281 | 15.951503891896234  | 4.221010607025953                         |
| 130       | 0                  | NA                  | NA                                        |
| 61        | NA                 | 20.31635783321264   | NA                                        |
| 107       | NA                 | 0                   | NA                                        |
| 135       | NA                 | NA                  | NA                                        |
| 16        | 10.93009117412     | NA                  | NA                                        |
| 95        | NA                 | NA                  | NA                                        |
| 25        | NA                 | 27.26758888817349   | NA                                        |
| 78        | NA                 | 13.979438856195     | NA                                        |
| 38        | NA                 | -7.0184637492031    | NA                                        |
| 59        | NA                 | 0                   | NA                                        |
| 137       | NA                 | NA                  | NA                                        |
| 89        | NA                 | NA                  | NA                                        |
| 92        | NA                 | 8.031584359335241   | NA                                        |
| 115       | NA                 | 0                   | NA                                        |
| 116       | NA                 | -35.12330378991061  | NA                                        |
| 56        | 36.593193844281    | NA                  | NA                                        |
| 136       | NA                 | NA                  | NA                                        |
| 142       | NA                 | 91.11066136359516   | NA                                        |
| 128       | 4.174579567361     | NA                  | NA                                        |
| 127       | 5.121696112977525  | NA                  | NA                                        |
| 67        | NA                 | NA                  | NA                                        |
| 122       | NA                 | 45.91109068426906   | NA                                        |
| 129       | NA                 | NA                  | NA                                        |
| 63        | NA                 | NA                  | NA                                        |
|           |                    |                     | (PD – baseline ≤ 0) OR (PD ≤ 0):<br>n= 19 |

**Supplementary Table S1: Patients with potential benefit of continuing PD-1/PD-L1 blockade beyond PD.** Highlighted lines are patients whose TGR assessed at PD was either null/negative, or inferior to TGR measured at baseline before ICI when both time points were available. Total = 19/43 patients.

| Oligo PD lesions | New lesions at PD2 | Interval PD-PD2 (months) | TGR oligo (%/month) |
|------------------|--------------------|--------------------------|---------------------|
| 1                | No                 | 2,73                     | 0,00                |
| 1                | No                 | 2,79                     | 2,93                |
| 2                | No                 | 3,35                     | 4,80                |
| 2                | No                 | 2,30                     | 7,33                |
| 1                | No                 | 1,28                     | 11,53               |
| 1                | No                 | 3,48                     | 12,12               |
| 2                | No                 | 2,60                     | 18,93               |
| 1                | No                 | 3,88                     | 20,07               |
| 2                | No                 | 1,28                     | 20,32               |
| 2                | No                 | 2,30                     | 20,85               |
| 1                | No                 | 1,54                     | 22,24               |
| 1                | No                 | 3,88                     | 23,00               |
| 1                | No                 | 1,12                     | 26,12               |
| 1                | No                 | 2,00                     | 31,16               |
| 1                | No                 | 1,15                     | 32,12               |
| 1                | No                 | 2,07                     | 32,71               |
| 2                | No                 | 2,33                     | 34,20               |
| 2                | No                 | 2,76                     | 35,04               |
| 1                | No                 | 2,07                     | 35,15               |
| 1                | No                 | 1,91                     | 41,68               |
| 1                | No                 | 3,61                     | 54,62               |
| 1                | No                 | 2,33                     | 58,30               |
| 2                | No                 | 1,77                     | 145,31              |
| 2                | No                 | 2,23                     | 160,37              |
| 1                | Yes                | 2,33                     | NA                  |
| 2                | Yes                | 2,99                     | NA                  |
| 1                | Yes                | 2,46                     | NA                  |
| 1                | Yes                | 2,04                     | NA                  |
| 3                | NA                 | NA                       | NA                  |
| 3                | NA                 | NA                       | NA                  |
| 1                | NA                 | NA                       | NA                  |
| 2                | NA                 | NA                       | NA                  |
|                  |                    | Mean PD-PD2              | Median TGR oligo    |
|                  |                    | 2,378165869              | 24,56 (IQR 17,84)   |

**Supplementary Table S2: Oligoprogression characterization.** « Oligo PD lesions » : number of progressing lesions in OPD under PD-1/PD-L1 blockade ; « New lesions PD2 » : presence of new lesions on « PD2 » imagery following first PD ; « Interval PD-PD2 » : time (months) elapsed between both imageries ; « TGR oligo » : TGR calculated specifically on progressing lesions in assessable OPD patient.

|                      |                                                                   | Primary resistance<br>(N=105) | PD after DCB<br>(N=43) |
|----------------------|-------------------------------------------------------------------|-------------------------------|------------------------|
| No treatment         |                                                                   | 38                            | 6                      |
| Subsequent treatment | Anti-PD-1/PD-L1 monotherapy continuation + locoregional treatment | 2                             | 3                      |
|                      | Anti-PD-1/PD-L1 monotherapy rechallenge after toxicity            | 0                             | 3                      |
|                      | Anti-PD-1/PD-L1 monotherapy continuation despite PD               | 9                             | 5                      |
|                      | Locoregional treatment alone                                      | 1                             | 2                      |
|                      | New systemic therapy                                              | 55                            | 24                     |
|                      | Platine doublet +or- bevacizumab                                  | 11                            | 3                      |
|                      | Taxane +or- bevacizumab                                           | 25                            | 6                      |
|                      | Tyrosine kinase inhibitor                                         | 8                             | 3                      |
|                      | Pemetrexed                                                        | 5                             | 7                      |
|                      | Vinorelbine                                                       | 3                             | 0                      |
|                      | Gemcitabine                                                       | 3                             | 5                      |

**Supplementary Table S3: Subsequent treatment after primary resistance or PD after DCB with anti-PD-1/PD-L1.**  
« Locoregional treatment » : radiation therapy, local ablative therapies or surgery
