# Supplementary material for: Longitudinal Study of Advanced Non-Small Cell Lung Cancer with Initial Durable Clinical Benefit to Immunotherapy: Strategies for Anti-PD-1/PD-L1 Continuation beyond Progression
Source: MDPI journal article supplement (doi:10.3390/cancers15235587), 2023-11-26

### Cancer model:

- Virtual tumor sphere of volume «  $V$  » and radius «  $R$  » =  $D/2$
- $D$  = sum of target lesions per RECIST 1.1
- Tumor sphere growth: exponential function of time «  $t$  »

$$V = 4 \pi R^3 / 3$$

$$V_t = V_0 \exp(\text{TG}.t)$$

$$\text{TG} = 3 \log(D_t/D_0)/t$$

$$\text{TGR} = 100 (\exp(\text{TG}) - 1)$$

Growth rate, in %/month, of the volume of the global virtual tumor sphere

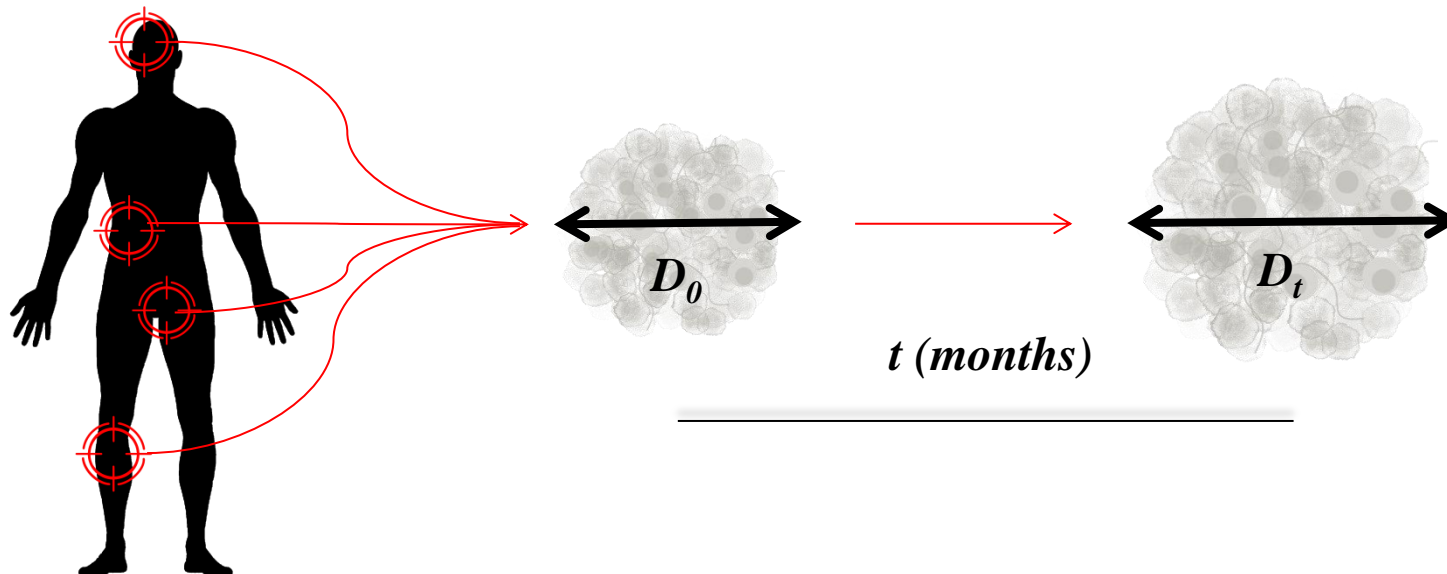

Supplement: s1 [file s1]
